# Supplementary material for: Gender Differences in Association between Air Pollution and Daily Mortality in the Capital of the Green Lungs of Poland–Population-Based Study with 2,953,000 Person-Years of Follow-Up
Source: PubMed Central journal article supplement (PMC7464921; doi:10.3390/jcm9082351), 2020-07-23
Supplement: jcm-09-02351-s001.pdf [file jcm-09-02351-s001.pdf]

## Supplementary material

**Table S1.** Detailed mortality in Bialystok in the years 2008–2017.

|                         | <b>Total mortality (female)</b> | <b>Total mortality (male)</b> | <b>Cardiovascular mortality (female)</b> | <b>Cardiovascular mortality (male)</b> | <b>P</b> |
|-------------------------|---------------------------------|-------------------------------|------------------------------------------|----------------------------------------|----------|
| Total, N; mean age (SD) | 16,154; 76.05 (15.48)           | 17,851; 68.33 (16.69)         | 8451; 81.29 (8.99)                       | 7919; 72.18 (12.12)                    | <0.001   |
| 2008, N; mean age (SD)  | 1478; 74.10 (16.67)             | 1683; 67.33 (16.83)           | 750; 80.02 (9.34)                        | 759; 71.86 (11.66)                     | <0.001   |
| 2009, N; mean age (SD)  | 1528; 74.61 (15.87)             | 1754; 67.23 (17.62)           | 797; 79.72 (9.44)                        | 780; 72.12 (12.33)                     | <0.001   |
| 2010, N; mean age (SD)  | 1528; 74.47 (16.41)             | 1729; 67.67 (16.88)           | 841; 80.62 (8.45)                        | 838; 71.16 (12.22)                     | <0.001   |
| 2011, N; mean age (SD)  | 1561; 74.47 (16.63)             | 1733; 68.14 (16.53)           | 817; 80.87 (9.39)                        | 774; 72.95 (12.08)                     | <0.001   |
| 2012, N; mean age (SD)  | 1539; 75.80 (15.38)             | 1716; 67.84 (16.72)           | 836; 79.98 (9.9)                         | 771; 71.91 (13.18)                     | <0.001   |
| 2013, N; mean age (SD)  | 1565; 77.07 (14.62)             | 1789; 67.79 (16.69)           | 844; 82 (8.46)                           | 787; 71.06 (11.8)                      | <0.001   |
| 2014, N; mean age (SD)  | 1633; 77.43 (14.57)             | 1805; 68.84 (16.26)           | 909; 82 (8.22)                           | 807; 72.88 (11.71)                     | <0.001   |
| 2015, N; mean age (SD)  | 1707; 76.72 (15.09)             | 1914; 69.2 (16.54)            | 849; 81.78 (8.99)                        | 826; 72.52 (11.98)                     | <0.001   |
| 2016, N; mean age (SD)  | 1769; 76.97 (14.81)             | 1786; 69.4 (16.46)            | 877; 82.32 (9.46)                        | 738; 72.66 (11.61)                     | <0.001   |
| 2017, N; mean age (SD)  | 1846; 78.08 (14.40)             | 1942; 69.59 (16.29)           | 931; 83.43 (8.39)                        | 839; 72.72 (12.63)                     | <0.001   |

**Table S2.** Statistics for yearly concentrations of air pollutants and weather conditions in the period of 2008–2017.

|                                                                             | <b>NO<sub>2</sub><br/>µg/m<sup>3</sup></b> | <b>SO<sub>2</sub><br/>µg/m<sup>3</sup></b> | <b>PM<sub>2.5</sub><br/>µg/m<sup>3</sup></b> | <b>PM<sub>10</sub><br/>µg/m<sup>3</sup></b> | <b>Temp.<br/>°C</b> | <b>RH %</b>   | <b>Atm. P.<br/>hPa</b> |
|-----------------------------------------------------------------------------|--------------------------------------------|--------------------------------------------|----------------------------------------------|---------------------------------------------|---------------------|---------------|------------------------|
| No. of observations, N,<br>%                                                | 3620,<br>99.09%                            | 3597,<br>98.45%                            | 2938,<br>80.43%                              | 3248,<br>88.91%                             | 3653,1<br>00%       | 3653,<br>100% | 3653,<br>100%          |
| Annual mean–2008                                                            | 14.51                                      | 2.64                                       | N/D                                          | 23.92                                       | 8.21                | 81.90         | 997.02                 |
| Annual mean–2009                                                            | 14.37                                      | 1.56                                       | 18.83                                        | 25.95                                       | 7.22                | 83.22         | 996.56                 |
| Annual mean–2010                                                            | 15.16                                      | 3.61                                       | 23.94                                        | 27.82                                       | 6.80                | 81.221        | 995.22                 |
| Annual mean–2011                                                            | 16.04                                      | 3.76                                       | 20.85                                        | 27.83                                       | 7.61                | 83.71         | 998.74                 |
| Annual mean–2012                                                            | 14.54                                      | 3.32                                       | 22.29                                        | 27.79                                       | 7.13                | 82.08         | 996.94                 |
| Annual mean–2013                                                            | 14.41                                      | 3.22                                       | 19.29                                        | 22.90                                       | 7.64                | 79.04         | 997.09                 |
| Annual mean–2014                                                            | 13.66                                      | 4.24                                       | 21.90                                        | 24.89                                       | 8.17                | 77.62         | 998.11                 |
| Annual mean–2015                                                            | 14.87                                      | 4.11                                       | 21.31                                        | 25.01                                       | 8.73                | 79.69         | 998.90                 |
| Annual mean–2016                                                            | 13.46                                      | 3.17                                       | 17.48                                        | 19.78                                       | 8.04                | 81.33         | 997.41                 |
| Annual mean–2017                                                            | 13.09                                      | 3.46                                       | 17.69                                        | 21.06                                       | 7.94                | 78.35         | 996.72                 |
| <b>Exceeded annual mean<br/>WHO guidelines<br/>values (number of years)</b> | <b>0</b>                                   | <b>N/A</b>                                 | <b>10</b>                                    | <b>10</b>                                   | <b>N/A</b>          | <b>N/A</b>    | <b>N/A</b>             |

**Abbreviations:** Atm. P., atmospheric pressure; IQR, interquartile range; N/A, not applicable; N/D, no data; NO<sub>2</sub>, nitrogen dioxide; *PM*<sub>2.5</sub>, particulate matter with a diameter of 2.5 μm or less; *PM*<sub>10</sub>, particulate matter with a diameter of 10 μm or less; *RH*, relative humidity; SD, standard deviation; SO<sub>2</sub>, sulfur dioxide; Temp., temperature; WHO, World Health Organization.

**Table S3.** Spearman’s correlations between physical variables and air pollutants.

|                                                                  |                                                               |                                                                 |                                                                |                                    |                                 |                                       |
|------------------------------------------------------------------|---------------------------------------------------------------|-----------------------------------------------------------------|----------------------------------------------------------------|------------------------------------|---------------------------------|---------------------------------------|
| NO <sub>2</sub><br>μg/m <sup>3</sup> —<br>daily mean<br>(N=3620) |                                                               |                                                                 |                                                                |                                    |                                 |                                       |
| R=0.28<br>P<0.001                                                | SO <sub>2</sub> μg/m <sup>3</sup> —<br>daily mean<br>(N=3597) |                                                                 |                                                                |                                    |                                 |                                       |
| R=0.53<br>P<0.001                                                | R=0.45<br>P<0.001                                             | PM <sub>2.5</sub> μg/m <sup>3</sup> —<br>daily mean<br>(N=2938) |                                                                |                                    |                                 |                                       |
| P=0.49<br>P<0.001                                                | R=0.40<br>P<0.001                                             | R=0.84<br>P<0.001                                               | PM <sub>10</sub> μg/m <sup>3</sup> —<br>daily mean<br>(N=3240) |                                    |                                 |                                       |
| R=-0.41<br>P<0.001                                               | R=-0.33<br>P<0.001                                            | R=-0.47<br>P<0.001                                              | R=-0.32<br>P<0.001                                             | Temp. °C<br>daily mean<br>(N=3653) |                                 |                                       |
| R=0.14<br>P<0.001                                                | R=0.09<br>P<0.001                                             | R=0.17<br>P<0.001                                               | R=0.03<br>P=0.08                                               | R=-0.36<br>P<0.001                 | RH, % daily<br>mean<br>(N=3653) |                                       |
| R=0.22<br>P<0.001                                                | R=0.06<br>P=0.002                                             | R=0.22<br>P<0.001                                               | R=0.22<br>P<0.001                                              | R=-0.26<br>P<0.001*                | R=-0.19<br>P<0.001*             | Atm. P. hPa<br>daily mean<br>(N=3653) |

**Abbreviations:** Atm. P., atmospheric pressure; NO<sub>2</sub>, nitrogen dioxide; *PM*<sub>2.5</sub>, particulate matter with a diameter of 2.5 μm or less; *PM*<sub>10</sub>, particulate matter with a diameter of 10 μm or less; *RH*, relative humidity; SO<sub>2</sub>, sulfur dioxide; Temp., temperature.
